# Supplementary material for: Preparation and characterization of a form-stable phase change hydrogel for heat-protective clothing
Source: Royal Society of Chemistry journal article supplement (doi:10.1039/d2nj05096j), 2022-12-13
Supplement: d2nj05096j1.pdf [file d2nj05096j1.pdf]

## **Preparation and characterization of a form-stable phase change hydrogel for heat-protective clothing**

**Yanfei Wang<sup>a</sup>, Jichen Zhang<sup>a</sup>, Xuelian Han<sup>b</sup> and Yong Jiang<sup>\*a</sup>.**

a School of Chemistry and Chemical Engineering, Southeast University, Nanjing 211189, P.R.  
China.

b. Research and Development Department, Haichang Contact Lens Co., Ltd.  
[hanxuelian1980@126.com](mailto:hanxuelian1980@126.com).

*Corresponding author:* E-mail: [yj@scu.edu.cn](mailto:yj@scu.edu.cn) (Jiang yong)

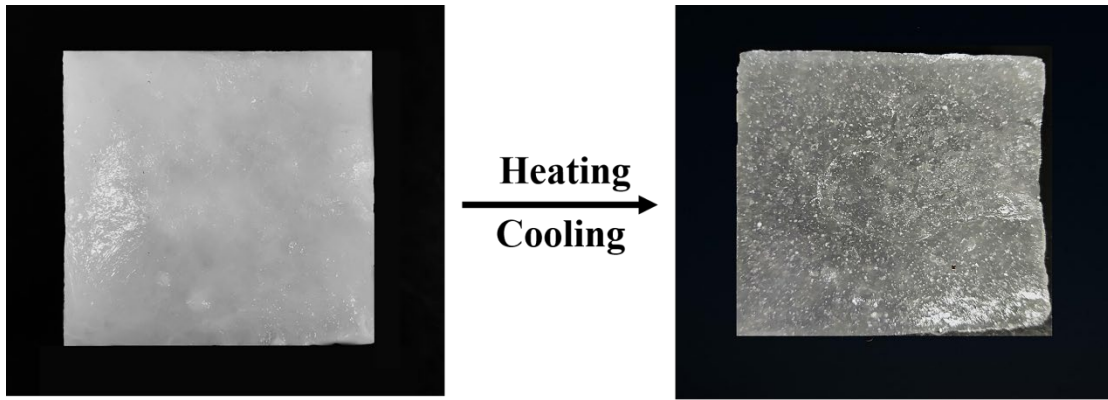

**Fig. S1** Physical diagram of PCH before and after the phase transition.

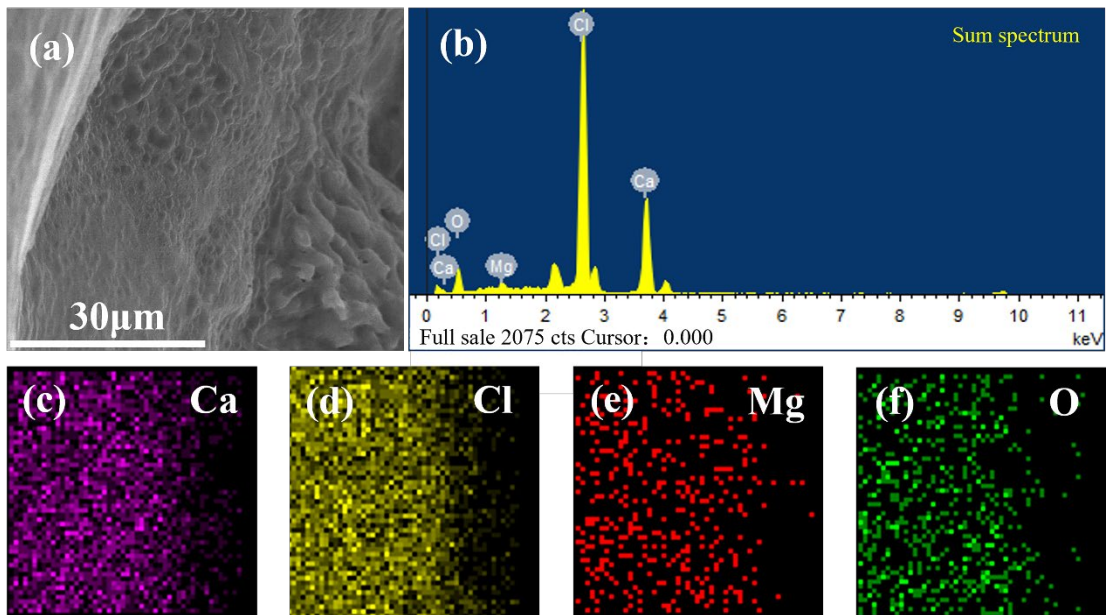

**Fig. S2** FE-SEM image of the PCH (a); element distribution spectrum (b); and the corresponding elemental mapping of (c) calcium, (d) chlorine, (e) magnesium, and (f) oxygen.

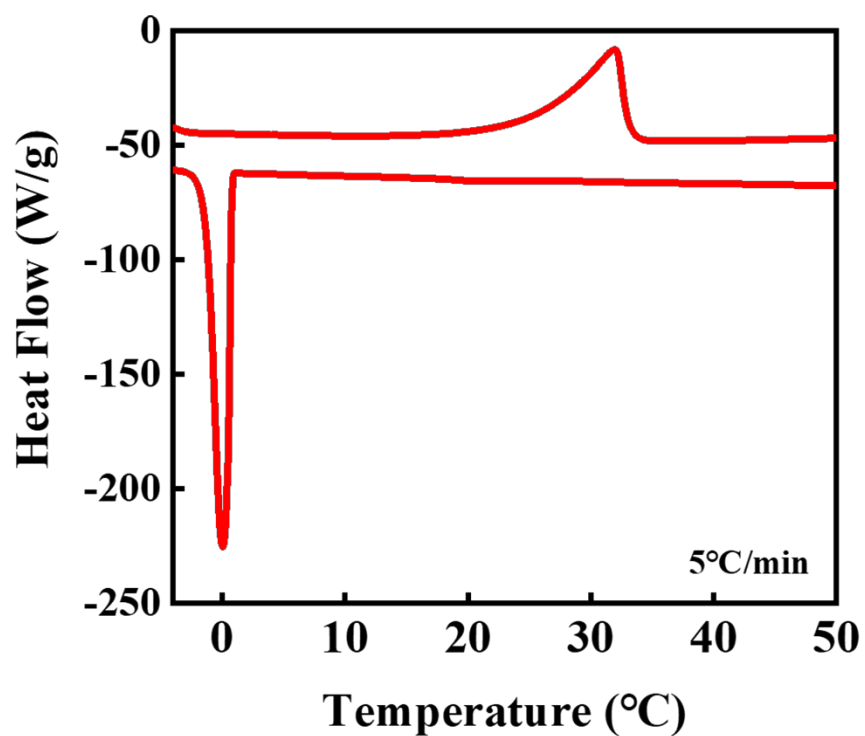

Fig.S3 DSC curves of the prepared PCH with 15wt.% MgCl<sub>2</sub>·6(H<sub>2</sub>O) content.

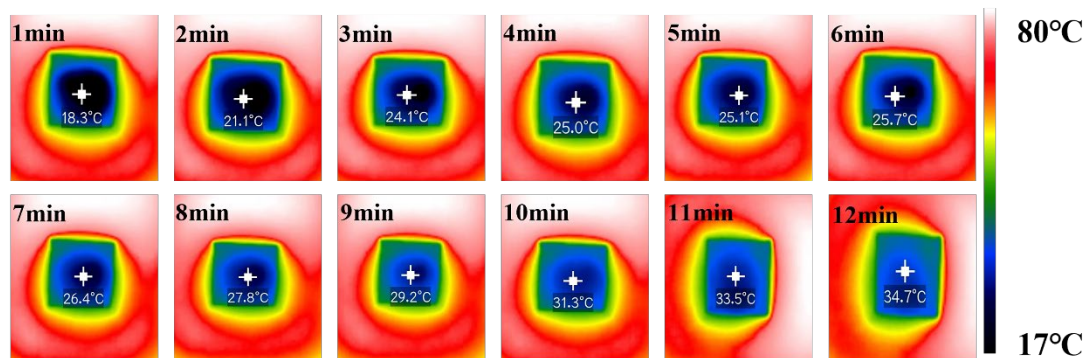

Fig. S4 Heating IR images of PCH on a 70 °C heating plate.

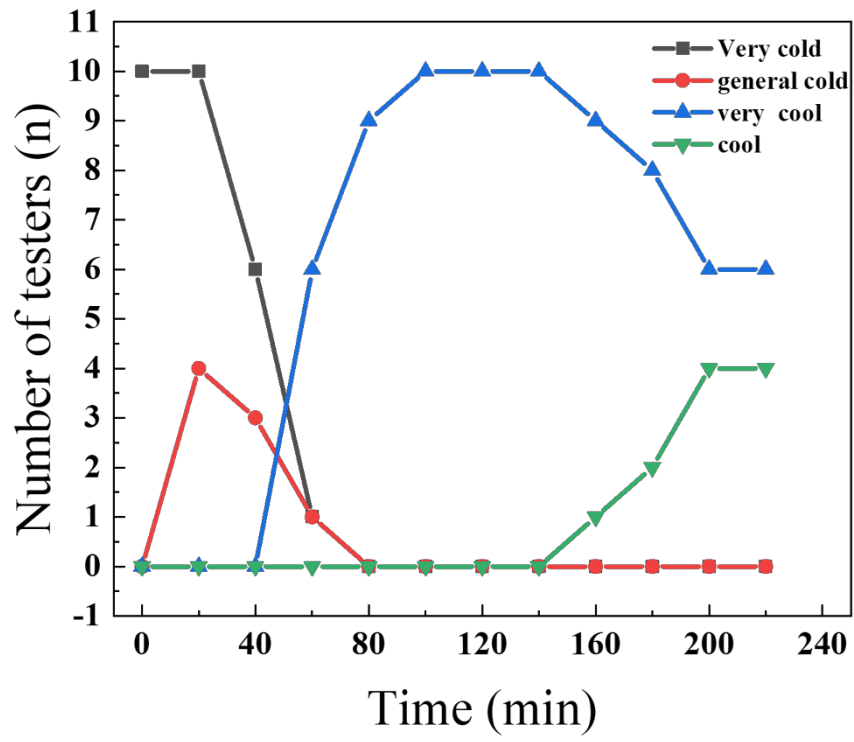

Fig. S5. Target user evaluation
